# Supplementary material
Source: publisher figshare collection journal article supplement (https://sage.figshare.com/ndownloader/files/17447801)
Supplement: Supplementary file 1 [file 17447801]

This File Explains the Process for Replicating the following Paper:

*Can Hierarchy Dodge Bullets? Examining Blame Attribution in Military Contracting*

By: Austin P. Johnson, Nehemia Geva, and Kenneth J. Meier

Notes and Explanation (Last Point is Critical):

- The empirical work in this article was generated through STATA, Version 13.1
- All variable labels are included within the .DTA dataset (STATA's proprietary format)
- The STATA Do-File goes table-by-table, and this corresponds to what is in the manuscript
- The models in the tables may not be in the same order as the Do-File
- The mediation boot-strapping procedure will, of course, lead to variation from sample-to-sample
